# Supplementary material for: Quartz Crystal Microbalance Platform for SARS-CoV-2 Immuno-Diagnostics
Source: MDPI journal article supplement (doi:10.3390/ijms242316705), 2023-11-24
Supplement: s1 [file s1]

Supplementary Materials:

# Quartz Crystal Microbalance Platform for SARS-CoV-2 Immuno-diagnostics

Per H. Nilsson <sup>1,2</sup>, Mahmoud Al-Majdoub <sup>3</sup>, Ahmed Ibrahim <sup>3</sup>, Obaidullah Aseel <sup>4</sup>, Subramanian Suriyanarayanan <sup>1</sup>, Linnea Andersson <sup>1</sup>, Samir Fostock <sup>3</sup>, Teodor Aastrup <sup>3</sup>, Ivar Tjernberg <sup>5</sup>, Ingvar Rydén <sup>6</sup>, and Ian A. Nicholls <sup>1\*</sup>

<sup>1</sup> Linnaeus University Centre for Biomaterials Chemistry, Department of Chemistry and Biomedical Sciences, Linnaeus University, SE-39182 Kalmar, Sweden

<sup>2</sup> Department of Immunology, University of Oslo and Oslo University Hospital Rikshospitalet, Sognsvannsveien 20, NO-0372 Oslo, Norway

<sup>3</sup> Attana AB, Greta Arwidssons Väg 21, SE-11419 Stockholm, Sweden

<sup>4</sup> Medical Programme, Faculty of Medicine and Health Sciences, SE-58225 Linköping University, Sweden

<sup>5</sup> Department of Clinical Chemistry and Transfusion Medicine, Region Kalmar County, SE-39185 Kalmar, Sweden, and Department of Biomedical and Clinical Sciences, Division of Inflammation and Infection, Linköping University, SE-58183 Linköping, Sweden

<sup>6</sup> Department of Research, Region Kalmar County, SE-39185 Kalmar, Sweden, and Department of Biomedical and Clinical Sciences, Division of Clinical Chemistry and Pharmacology, Linköping University, SE-58183 Linköping, Sweden

\* Correspondence: [ian.nicholls@lnu.se](mailto:ian.nicholls@lnu.se)

## Table of Contents

| Page | Content                                                                                                                                                                                                                                                                         |
|------|---------------------------------------------------------------------------------------------------------------------------------------------------------------------------------------------------------------------------------------------------------------------------------|
| S2   | <b>Fig. S-1.</b> QCM trace (curve <i>a</i> ) showing the immobilization of RBD on the LNB chip. (A) activation of LNB-chip by EDC/Sulfo-NHS, (B) RBD immobilization and (C) deactivation with ethanolamine. Curve <i>b</i> is the corresponding reference LNB chip without RBD. |
| S3   | <b>Fig. S-2.</b> Binding energy profile recorded with XPS for the LNB chip measured (A) before and (B) after the immobilization of RBD                                                                                                                                          |
| S4   | <b>Fig. S-3.</b> Injection of serum sample on reference chip (without immobilized RBD).                                                                                                                                                                                         |
| S5   | <b>Table S-1.</b> Raw data from the detection of SARS-CoV-2 antibodies in 119 serum samples analyzed by the QCM, YHLO, and Roche assays.                                                                                                                                        |
| S8   | <b>Fig. S-4.</b> Coherence between QCM, Roche, and YHLO SARS-CoV-2 antibody assays – graphical representation                                                                                                                                                                   |

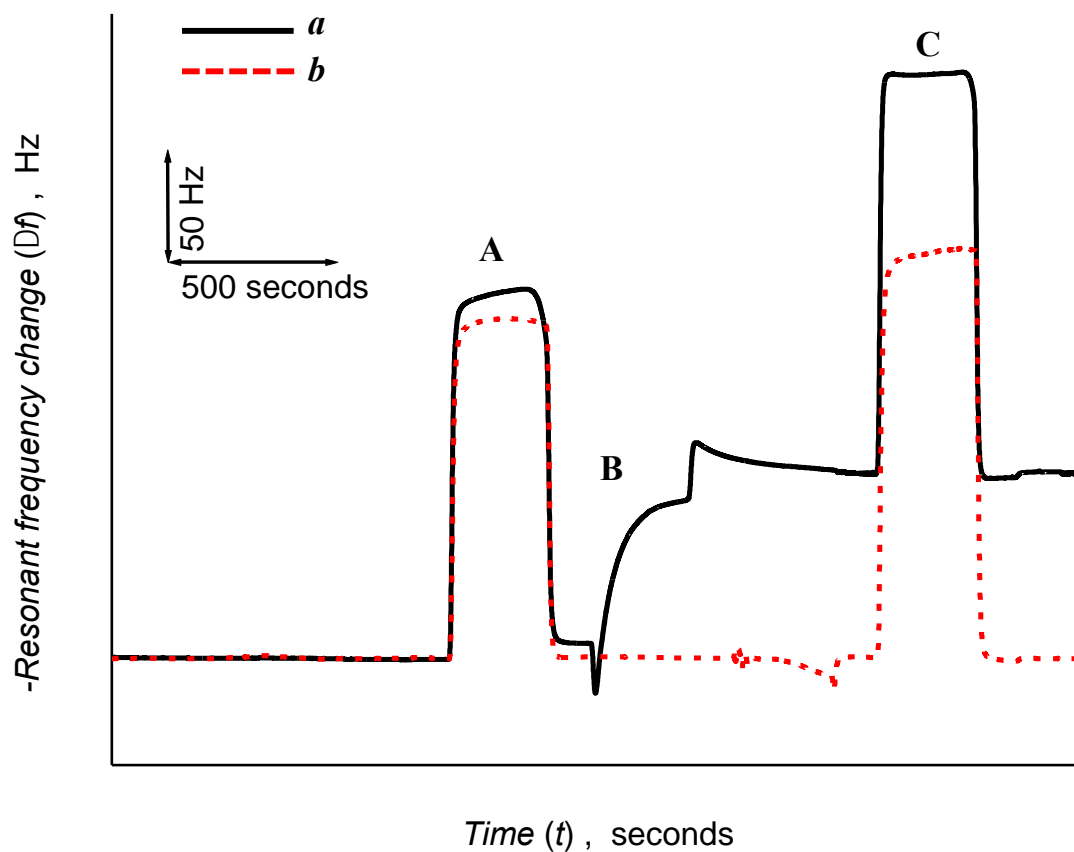

**Fig. S-1.** QCM trace (curve *a*) showing the immobilization of RBD on the LNB chip. (A) activation of LNB-chip by EDC/Sulfo-NHS, (B) RBD immobilization and (C) deactivation with ethanolamine. Curve *b* is the corresponding reference LNB chip without RBD.

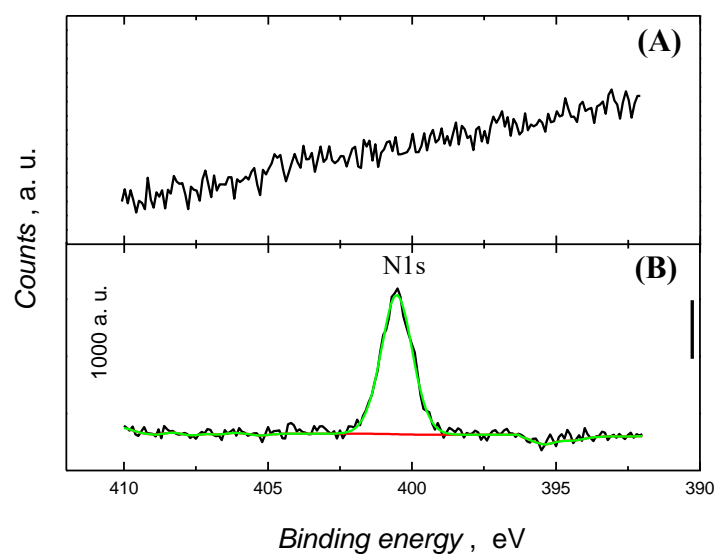

**Fig. S-2.** Binding energy profile recorded with XPS for the LNB chip measured (A) before and (B) after the immobilization of RBD. The presence of nitrogen after immobilization (together with antibody-based QCM response) provides evidence for the presence of the protein on the sensor chip surface.

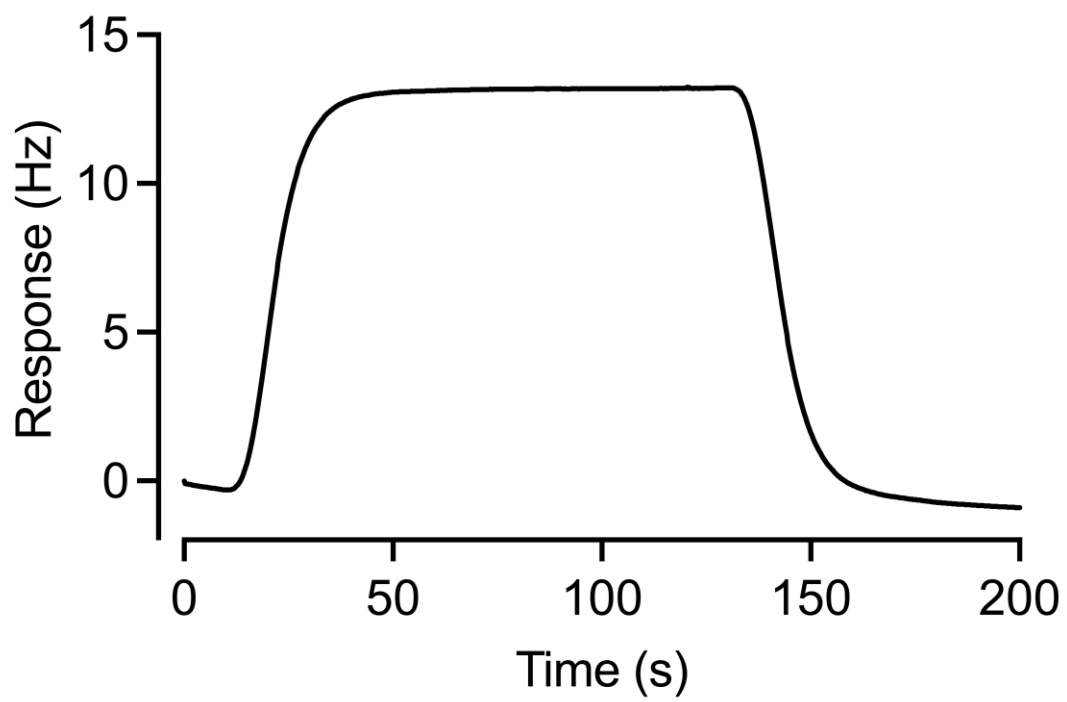

Fig. S-3. Injection of serum sample on reference chip (without immobilized RBD).

**Table SI-1. Raw data for the detection of SARS-CoV-2 antibodies in 119 serum samples analyzed by the QCM, YHLO, and Roche assays.** A response  $\geq 2.5$  in the QCM assay,  $\geq 10.00$  in the YHLO, and  $\geq 1.00$  in the Roche assay was regarded as a positive response (marked in green), and a response below was regarded as negative (marked in red). The samples are sorted according to the response in the QCM assay.

| Sample | QCM           |             | YHLO            |              | Roche           |             |
|--------|---------------|-------------|-----------------|--------------|-----------------|-------------|
|        | Response (Hz) | $\geq 2.50$ | Response (U/mL) | $\geq 10.00$ | Response (U/mL) | $\geq 1.00$ |
| 1      | 14.09         | Pos         | 46.27           | Pos          | 71.1            | Pos         |
| 2      | 14.08         | Pos         | 36.53           | Pos          | 32.0            | Pos         |
| 3      | 13.98         | Pos         | 23.78           | Pos          | 17.70           | Pos         |
| 4      | 13.56         | Pos         | 105.03          | Pos          | 78.90           | Pos         |
| 5      | 13.45         | Pos         | 96.33           | Pos          | 86.20           | Pos         |
| 6      | 11.88         | Pos         | 86.80           | Pos          | 151             | Pos         |
| 7      | 9.85          | Pos         | 52.65           | Pos          | 89.6            | Pos         |
| 8      | 9.72          | Pos         | 105.65          | Pos          | 110             | Pos         |
| 9      | 8.74          | Pos         | 103.65          | Pos          | 142             | Pos         |
| 10     | 8.72          | Pos         | 27.68           | Pos          | 50.3            | Pos         |
| 11     | 8.44          | Pos         | 7.99            | Neg          | 6.93            | Pos         |
| 12     | 8.38          | Pos         | 111.45          | Pos          | 137             | Pos         |
| 13     | 7.87          | Pos         | 12.24           | Pos          | 25.7            | Pos         |
| 14     | 7.72          | Pos         | 62.62           | Pos          | 110             | Pos         |
| 15     | 7.44          | Pos         | 129.18          | Pos          | 116             | Pos         |
| 16     | 7.33          | Pos         | 65.07           | Pos          | 38.8            | Pos         |
| 17     | 7.17          | Pos         | 52.89           | Pos          | 127             | Pos         |
| 18     | 6.53          | Pos         | 29.99           | Pos          | 52.9            | Pos         |
| 19     | 6.31          | Pos         | 103.04          | Pos          | 58.9            | Pos         |
| 20     | 6.31          | Pos         | 81.19           | Pos          | 168             | Pos         |
| 21     | 5.99          | Pos         | 87.07           | Pos          | 108             | Pos         |
| 22     | 5.96          | Pos         | 13.19           | Pos          | 31.6            | Pos         |
| 23     | 5.79          | Pos         | 129.48          | Pos          | 90.7            | Pos         |
| 24     | 5.73          | Pos         | 67.62           | Pos          | 92.0            | Pos         |
| 25     | 5.68          | Pos         | 21.54           | Pos          | 47.6            | Pos         |
| 26     | 5.18          | Pos         | 100.25          | Pos          | 111             | Pos         |
| 27     | 4.94          | Pos         | 83.87           | Pos          | 146             | Pos         |
| 28     | 4.81          | Pos         | 15.96           | Pos          | 13.6            | Pos         |
| 29     | 4.69          | Pos         | 85.28           | Pos          | 158             | Pos         |
| 30     | 4.67          | Pos         | 44.01           | Pos          | 87.4            | Pos         |
| 31     | 4.63          | Pos         | 24.04           | Pos          | 30.0            | Pos         |
| 32     | 4.60          | Pos         | 24.62           | Pos          | 45.4            | Pos         |
| 33     | 4.43          | Pos         | 20.57           | Pos          | 37.0            | Pos         |
| 34     | 4.20          | Pos         | 26.94           | Pos          | 55.6            | Pos         |
| 35     | 4.14          | Pos         | 64.08           | Pos          | 141             | Pos         |
| 36     | 4.11          | Pos         | 63.34           | Pos          | 152             | Pos         |
| 37     | 4.08          | Pos         | 60.36           | Pos          | 125             | Pos         |

|    |      |     |        |     |      |     |
|----|------|-----|--------|-----|------|-----|
| 38 | 4.03 | Pos | 25.77  | Pos | 20.1 | Pos |
| 39 | 4.03 | Pos | 49.39  | Pos | 79.9 | Pos |
| 40 | 3.97 | Pos | 45.48  | Pos | 117  | Pos |
| 41 | 3.36 | Pos | 39.15  | Pos | 98.3 | Pos |
| 42 | 3.21 | Pos | 18.18  | Pos | 22.1 | Pos |
| 43 | 3.17 | Pos | 132.27 | Pos | 106  | Pos |
| 44 | 2.78 | Pos | 60.23  | Pos | 146  | Pos |
| 45 | 2.60 | Pos | 64.37  | Pos | 149  | Pos |
| 46 | 2.54 | Pos | 20.48  | Pos | 44.0 | Pos |
| 47 | 2.54 | Pos | 0.08   | Neg | 0.08 | Neg |
| 48 | 2.52 | Pos | 3.27   | Neg | 2.24 | Pos |
| 49 | 2.46 | Neg | 0.50   | Neg | 0.08 | Neg |
| 50 | 2.41 | Neg | 28.45  | Pos | 54.2 | Pos |
| 51 | 2.17 | Neg | 0.12   | Neg | 0.08 | Neg |
| 52 | 2.14 | Neg | 5.80   | Neg | 1.98 | Pos |
| 53 | 2.05 | Neg | 12.31  | Pos | 28.6 | Pos |
| 54 | 1.96 | Neg | 0.53   | Neg | 0.09 | Neg |
| 55 | 1.94 | Neg | 4.24   | Neg | 6.45 | Pos |
| 56 | 1.89 | Neg | 0.10   | Neg | 0.08 | Neg |
| 57 | 1.84 | Neg | 123.72 | Pos | 123  | Pos |
| 58 | 1.74 | Neg | 6.54   | Neg | 6.41 | Pos |
| 59 | 1.71 | Neg | 3.04   | Neg | 4.19 | Pos |
| 60 | 1.68 | Neg | 0.09   | Neg | 0.09 | Neg |
| 61 | 1.44 | Neg | 0.09   | Neg | 0.08 | Neg |
| 62 | 1.43 | Neg | 70.79  | Pos | 149  | Pos |
| 63 | 1.42 | Neg | 0.17   | Neg | 0.09 | Neg |
| 64 | 1.40 | Neg | 0.55   | Neg | 0.08 | Neg |
| 65 | 1.36 | Neg | 0.10   | Neg | 0.08 | Neg |
| 66 | 1.28 | Neg | 13.45  | Pos | 9.33 | Pos |
| 67 | 1.20 | Neg | 0.14   | Neg | 0.08 | Neg |
| 68 | 1.20 | Neg | 0.14   | Neg | 0.09 | Neg |
| 69 | 1.19 | Neg | 0.14   | Neg | 0.09 | Neg |
| 70 | 1.18 | Neg | 5.02   | Neg | 0.30 | Neg |
| 71 | 1.17 | Neg | 0.11   | Neg | 0.08 | Neg |
| 72 | 1.14 | Neg | 24.75  | Pos | 51.7 | Pos |
| 73 | 1.10 | Neg | 0.17   | Neg | 0.09 | Neg |
| 74 | 1.08 | Neg | 0.10   | Neg | 0.08 | Neg |
| 75 | 1.00 | Neg | 0.23   | Neg | 0.09 | Neg |
| 76 | 0.98 | Neg | 0.12   | Neg | 0.09 | Neg |
| 77 | 0.97 | Neg | 0.59   | Neg | 0.10 | Neg |
| 78 | 0.96 | Neg | 0.78   | Neg | 0.09 | Neg |
| 79 | 0.88 | Neg | 13.89  | Pos | 18.0 | Pos |
| 80 | 0.87 | Neg | 0.17   | Neg | 0.10 | Neg |

|     |       |     |      |     |      |     |
|-----|-------|-----|------|-----|------|-----|
| 81  | 0.85  | Neg | 0.20 | Neg | 1.29 | Pos |
| 82  | 0.81  | Neg | 0.12 | Neg | 0.08 | Neg |
| 83  | 0.79  | Neg | 0.12 | Neg | 0.08 | Neg |
| 84  | 0.74  | Neg | 0.28 | Neg | 0.09 | Neg |
| 85  | 0.70  | Neg | 0.17 | Neg | 0.08 | Neg |
| 86  | 0.70  | Neg | 2.94 | Neg | 0.93 | Neg |
| 87  | 0.66  | Neg | 0.37 | Neg | 0.08 | Neg |
| 88  | 0.65  | Neg | 0.33 | Neg | 0.09 | Neg |
| 89  | 0.62  | Neg | 0.52 | Neg | 0.08 | Neg |
| 90  | 0.59  | Neg | 0.30 | Neg | 0.08 | Neg |
| 91  | 0.55  | Neg | 0.15 | Neg | 0.08 | Neg |
| 92  | 0.52  | Neg | 0.52 | Neg | 0.09 | Neg |
| 93  | 0.50  | Neg | 0.26 | Neg | 0.09 | Neg |
| 94  | 0.50  | Neg | 0.17 | Neg | 0.09 | Neg |
| 95  | 0.46  | Neg | 0.44 | Neg | 0.09 | Neg |
| 96  | 0.42  | Neg | 0.65 | Neg | 0.08 | Neg |
| 97  | 0.40  | Neg | 0.35 | Neg | 0.09 | Neg |
| 98  | 0.39  | Neg | 0.88 | Neg | 0.09 | Neg |
| 99  | 0.39  | Neg | 0.34 | Neg | 0.09 | Neg |
| 100 | 0.35  | Neg | 0.57 | Neg | 0.08 | Neg |
| 101 | 0.31  | Neg | 1.60 | Neg | 0.09 | Neg |
| 102 | 0.29  | Neg | 0.29 | Neg | 0.09 | Neg |
| 103 | 0.29  | Neg | 1.02 | Neg | 0.09 | Neg |
| 104 | 0.27  | Neg | 0.72 | Neg | 0.08 | Neg |
| 105 | 0.25  | Neg | 0.72 | Neg | 0.08 | Neg |
| 106 | 0.15  | Neg | 0.23 | Neg | 0.08 | Neg |
| 107 | 0.15  | Neg | 0.23 | Neg | 0.09 | Neg |
| 108 | 0.15  | Neg | 6.04 | Neg | 0.09 | Neg |
| 109 | 0.13  | Neg | 0.66 | Neg | 0.09 | Neg |
| 110 | 0.11  | Neg | 0.30 | Neg | 0.08 | Neg |
| 111 | 0.04  | Neg | 0.39 | Neg | 0.08 | Neg |
| 112 | -0.02 | Neg | 0.24 | Neg | 0.08 | Neg |
| 113 | -0.05 | Neg | 1.13 | Neg | 0.08 | Neg |
| 114 | -0.05 | Neg | 0.28 | Neg | 0.09 | Neg |
| 115 | -0.07 | Neg | 0.21 | Neg | 0.08 | Neg |
| 116 | -0.10 | Neg | 0.37 | Neg | 0.10 | Neg |
| 117 | -0.11 | Neg | 0.20 | Neg | 0.09 | Neg |
| 118 | -0.19 | Neg | 0.33 | Neg | 0.08 | Neg |
| 119 | -0.24 | Neg | 0.26 | Neg | 0.09 | Neg |

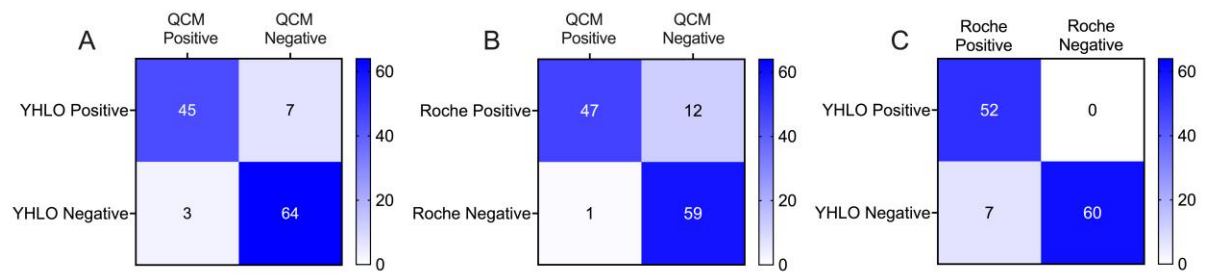

**Figure S-4. Coherence between QCM, Roche, and YHLO SARS-CoV-2 antibody assays.** Sera were analyzed for the presence of antibodies against SARS-CoV-2 RBD spike protein. Of the 119 analyzed samples, 48, 52, and 59 were positive in the QCM, Roche, and YHLO assays. The figure represents coherence between QCM and YHLO (A), QCM and Roche (B), Roche and YHLO (C).
